# Supplementary material for: Does pulse oximeter use impact health outcomes? A systematic review
Source: HighWire-hosted journal article supplement (doi:10.1136/archdischild-2015-309638), 2015-12-23
Supplement: archdischild-2015-309638supp_AppendixI.pdf [file archdischild-2015-309638supp_AppendixI.pdf]

Appendix I: search terms and search methods

| Database         | Searches performed                                                                                                                                                                                                                                                                                                                                                                                                                                                                                                                                                                                                                                                                                     | Date             | Notes                                                                              |
|------------------|--------------------------------------------------------------------------------------------------------------------------------------------------------------------------------------------------------------------------------------------------------------------------------------------------------------------------------------------------------------------------------------------------------------------------------------------------------------------------------------------------------------------------------------------------------------------------------------------------------------------------------------------------------------------------------------------------------|------------------|------------------------------------------------------------------------------------|
| Dare             | <b>1. [any field] “pulse oximeter” OR [any field] “pulse oximetry”</b>                                                                                                                                                                                                                                                                                                                                                                                                                                                                                                                                                                                                                                 | January 7, 2015  | The Dare tickbox was ticked for the search                                         |
| Pubmed           | <p>1. (((“Infant”[Mesh]) OR “Child”[Mesh]) OR “Adolescent”[Mesh]) OR “Pediatrics”[Mesh]</p> <p>2. (Newborn*[Title/Abstract] OR Neonat*[Title/Abstract] OR Baby*[Title/Abstract] OR Babies[Title/Abstract] OR Infant*[Title/Abstract] OR Child*[Title/Abstract] OR Kid*[Title/Abstract] OR Toddler*[Title/Abstract] OR Adoles*[Title/Abstract] OR Teen*[Title/Abstract] OR Boy*[Title/Abstract] OR Girl*[Title/Abstract] OR Paediatric*[Title/Abstract] OR Peadiatric*[Title/Abstract] OR Pediatric*[Title/Abstract])</p> <p>3. #1 OR #2</p> <p>4. “Oximetry”[Mesh]</p> <p>5. (“Pulse oximeter*”[Title/Abstract] OR “Pulse oximetry”[Title/Abstract])</p> <p>6. #4 OR #5</p> <p><b>7. #3 AND #6</b></p> | January 9, 2015  |                                                                                    |
| Web of Science   | <p>1. TS=(“Pulse oximeter*” OR “Pulse oximetry”) OR TI=(“Pulse oximeter*” OR “Pulse oximetry”)</p> <p>2. TS=(Newborn* OR Neonat* OR Baby* OR Babies OR Infant* OR Child* OR Kid* OR Toddler* OR Adoles* OR Teen* OR Boy* OR Girl* OR Paediatric* OR Peadiatric* OR Pediatric*) OR TI=(Newborn* OR Neonat* OR Baby* OR Babies OR Infant* OR Child* OR Kid* OR Toddler* OR Adoles* OR Teen* OR Boy* OR Girl* OR Paediatric* OR Peadiatric* OR Pediatric*)</p> <p><b>3. #1 AND #2</b></p>                                                                                                                                                                                                                 | January 13, 2015 | In “All databases” and for all years                                               |
| Cochrane library | <b>1. “pulse oximeter” OR “pulse oximetry”</b>                                                                                                                                                                                                                                                                                                                                                                                                                                                                                                                                                                                                                                                         | January 8, 2015  | In “Title, Abstract or Keywords”<br><br>“Cochrane reviews”,<br>“Other reviews” and |

|                           |                                                                                                                                                                                                                                                                                                                                                                                                                                                                                                                                                                        |                  |                                                                                                                                                                                                                                     |
|---------------------------|------------------------------------------------------------------------------------------------------------------------------------------------------------------------------------------------------------------------------------------------------------------------------------------------------------------------------------------------------------------------------------------------------------------------------------------------------------------------------------------------------------------------------------------------------------------------|------------------|-------------------------------------------------------------------------------------------------------------------------------------------------------------------------------------------------------------------------------------|
|                           |                                                                                                                                                                                                                                                                                                                                                                                                                                                                                                                                                                        |                  | "Technology assessments" tick boxes were ticked                                                                                                                                                                                     |
| Medion                    | <b>1. Pulse oximeter</b><br><b>2. Pulse oximetry</b>                                                                                                                                                                                                                                                                                                                                                                                                                                                                                                                   | January 8, 2015  | In "Topics"                                                                                                                                                                                                                         |
| WHO Global Health Library | <b>1. Pulse oximeter</b><br><b>2. Pulse oximeter</b><br><b>3. Pulse oximetry</b><br><b>4. Pulse oximetry</b>                                                                                                                                                                                                                                                                                                                                                                                                                                                           | January 8, 2015  | #1 and #3 were in "title" and in "regional"; #2 and #4 were in "subject" and in "regional"                                                                                                                                          |
| Embase                    | 1. Pulse oximeter/ or pulse oximetry/<br>2. ("Pulse oximeter*" or "Pulse oximetry").mp.<br>3. ("Pulse oximeter*" or "Pulse oximetry").m_titl.<br>4. #1 OR #2 OR #3<br>5. (Newborn* OR Neonat* OR Baby* OR Babies OR Infant* OR Child* OR Kid* OR Toddler* OR Adoles* OR Teen* OR Boy* OR Girl* OR Paediatric* OR Peadiatric* OR Pediatric*).mp.<br>6. (Newborn* OR Neonat* OR Baby* OR Babies OR Infant* OR Child* OR Kid* OR Toddler* OR Adoles* OR Teen* OR Boy* OR Girl* OR Paediatric* OR Peadiatric* OR Pediatric*).m_titl.<br>7. #5 OR #6<br><b>8. #4 AND #7</b> | January 14, 2015 | -#1 was done by "mapping to subject headings" but not ticking "explode"<br>-mp=title, abstract, subject headings, heading word, drug trade name, original title, device manufacturer, drug manufacturer, device trade name, keyword |
| Global Health             | 1. ("Pulse oximeter*" OR "Pulse oximetry").mp.<br>2. ("Pulse oximeter*" OR "Pulse oximetry").m_titl.<br>3. #1 or #2<br>4. (Newborn* OR Neonat* OR Baby* OR Babies OR Infant* OR Child* OR Kid* OR Toddler* OR Adoles* OR Teen* OR Boy* OR Girl* OR Paediatric* OR Peadiatric* OR Pediatric*).mp.<br>5. (Newborn* OR Neonat* OR Baby* OR Babies OR Infant* OR Child* OR Kid* OR Toddler* OR Adoles* OR Teen* OR Boy* OR Girl* OR Paediatric* OR Peadiatric* OR Pediatric*).m_titl.<br>6. #4 OR #5                                                                       | January 14, 2015 | mp=abstract, title, original title, broad terms, heading words, identifiers, cabicodes                                                                                                                                              |

|        |                                                                                                                                                                                                                                                                                                                                                                                                                                                                                        |                  |  |
|--------|----------------------------------------------------------------------------------------------------------------------------------------------------------------------------------------------------------------------------------------------------------------------------------------------------------------------------------------------------------------------------------------------------------------------------------------------------------------------------------------|------------------|--|
|        | <b>7. #3 AND #6</b>                                                                                                                                                                                                                                                                                                                                                                                                                                                                    |                  |  |
| CINAHL | <p>1. TI ("Pulse oximeter*" OR "Pulse oximetry") OR AB ("Pulse oximeter*" OR "Pulse oximetry")</p> <p>2. TI (Newborn* OR Neonat* OR Baby* OR Babies OR Infant* OR Child* OR Kid* OR Toddler* OR Adoles* OR Teen* OR Boy* OR Girl* OR Paediatric* OR Peadiatric* OR Pediatric*) OR AB (Newborn* OR Neonat* OR Baby* OR Babies OR Infant* OR Child* OR Kid* OR Toddler* OR Adoles* OR Teen* OR Boy* OR Girl* OR Paediatric* OR Peadiatric* OR Pediatric*)</p> <p><b>3. #1 AND #2</b></p> | January 14, 2015 |  |

Note: the search(es) shown in **bold** is/are the one(s) from which results were taken

The websites of the following organizations were searched using the search terms 'pulse oximeter' and 'pulse oximetry' to obtain unpublished reports: the World Health Organization, the World Bank, USAID, Public Health England, the UK's Department of Health, NHS Evidence – NICE, PATH, Save the Children, Save the Children UK, MSF, Oxfam, UNICEF, the International Union Against Tuberculosis and Lung Disease, the British Lung Foundation, and the World Heart Foundation.
